# Supplementary material
Source: PubMed Central journal article supplement (PMC5820204)
Supplement: NIHMS916231-supplement-1.pdf [file NIHMS916231-supplement-1.pdf]

**Supplementary table 1. *CFH* (rs1061170) and *ARMS2* (rs10490924) common variant genotype distributions in cases and controls.**

| <b><i>CFH</i> genotype</b> |     |      |     |       |        |
|----------------------------|-----|------|-----|-------|--------|
|                            | TT  | CT   | CC  | Total | p      |
| Controls                   | 571 | 723  | 224 | 1518  | <0.001 |
| Cases                      | 279 | 738  | 672 | 1689  |        |
| Total                      | 850 | 1461 | 896 | 3207  |        |

| <b><i>ARMS2</i> genotype</b> |      |      |     |       |        |
|------------------------------|------|------|-----|-------|--------|
|                              | GG   | GT   | TT  | Total | p      |
| Controls                     | 912  | 535  | 71  | 1518  | <0.001 |
| Cases                        | 638  | 734  | 317 | 1689  |        |
| Total                        | 1550 | 1269 | 388 | 3207  |        |
