# Supplementary material
Source: PubMed Central journal article supplement (PMC5820204)
Supplement: NIHMS916231-supplement-2.pdf [file NIHMS916231-supplement-2.pdf]

**Supplementary table 2. Baseline demographic factor comparison in rare variant carriers vs. non-carriers within cases.**

|                           | Rare variant carriers<br>n=298 | Non-rare variant carriers<br>n=1391 | p     |
|---------------------------|--------------------------------|-------------------------------------|-------|
| Mean Age (SD)             | 71.2 (6.5)                     | 70.7 (7.2)                          | 0.162 |
| Gender, male (%)          | 46.6%                          | 45.4%                               | 0.704 |
| Smoking Status            |                                |                                     | 0.107 |
| Never (%)                 | 47.3%                          | 41.0%                               |       |
| Past (%)                  | 48.3%                          | 52.9%                               |       |
| Current (%)               | 4.4%                           | 6.0%                                |       |
| <i>CFH</i> (rs1061170)    |                                |                                     | 0.449 |
| TT (%)                    | 17.8%                          | 16.2%                               |       |
| CT (%)                    | 45.6%                          | 43.3%                               |       |
| CC (%)                    | 36.6%                          | 40.5%                               |       |
| <i>ARMS2</i> (rs10490924) |                                |                                     | 0.029 |
| GG (%)                    | 31.2%                          | 39.2%                               |       |
| GT (%)                    | 49.3%                          | 42.2%                               |       |
| TT (%)                    | 19.5%                          | 18.6%                               |       |
