# Supplementary material
Source: PubMed Central journal article supplement (PMC5820204)
Supplement: NIHMS916231-supplement-3.pdf [file NIHMS916231-supplement-3.pdf]

Supplementary table 3. Genes containing a rare predicted loss of function variant in cases and controls

| Gene Symbol     | Gene Name                                                            | Pathway              | Chr | AMD Locus | AMD Locus Name        | Total rare variants in cases | Total rare variants in controls |
|-----------------|----------------------------------------------------------------------|----------------------|-----|-----------|-----------------------|------------------------------|---------------------------------|
| <i>ABCA1</i>    | ATP-binding cassette, sub-family A (ABC1), member 1                  | Lipids               | 9   | 16        | <i>ABCA1</i>          | 12                           | 8                               |
| <i>ABCA7</i>    | ATP-binding cassette, sub-family A (ABC1), member 7                  | Lipids               | 19  | 29        | <i>CNN2</i>           | 6                            | 8                               |
| <i>ACAD10</i>   | acyl-CoA dehydrogenase family, member 10                             | Lipids               | 12  | 20        | <i>ACAD10</i>         | 5                            | 6                               |
| <i>ADAMTS9</i>  | ADAM metalloproteinase with thrombospondin type 1 motif, 9           | Extracellular Matrix | 3   | 3         | <i>ADAMTS9-AS2</i>    | 5                            | 3                               |
| <i>AGER</i>     | advanced glycosylation end product-specific receptor                 | Immune System        | 6   | 8         | <i>C2/CFB/SKIV2L</i>  | 2                            | 1                               |
| <i>ALDH2</i>    | aldehyde dehydrogenase 2 family (mitochondrial)                      | Unknown/other        | 12  | 20        | <i>ACAD10</i>         | 2                            | 2                               |
| <i>ALG2</i>     | ALG2, alpha-1,3/1,6-mannosyltransferase                              | Unknown/other        | 9   | 15        | <i>TGFBR1</i>         | 0                            | 2                               |
| <i>ARHGAP21</i> | Rho GTPase activating protein 21                                     | Unknown/other        | 10  | 17        | <i>ARHGAP21</i>       | 7                            | 3                               |
| <i>ARL16</i>    | ADP-ribosylation factor-like 16                                      | Unknown/other        | 17  | 27        | <i>NPLOC4/TSPAN10</i> | 2                            | 1                               |
| <i>ASPM</i>     | asp (abnormal spindle) homolog, microcephaly associated (Drosophila) | Unknown/other        | 1   | 1         | <i>CFH</i>            | 1                            | 3                               |
| <i>ATF6B</i>    | activating transcription factor 6 beta                               | Cell Survival        | 6   | 8         | <i>C2/CFB/SKIV2L</i>  | 1                            | 0                               |
| <i>B3GALTL</i>  | beta 1,3-galactosyltransferase-like                                  | Unknown/other        | 13  | 21        | <i>B3GALTL</i>        | 3                            | 6                               |
| <i>BAHCC1</i>   | BAH domain and coiled-coil containing 1                              | Unknown/other        | 17  | 27        | <i>NPLOC4/TSPAN10</i> | 6                            | 0                               |
| <i>BAIAP2L2</i> | BAI1-associated protein 2-like 2                                     | Unknown/other        | 13  | 34        | <i>SLC16A8</i>        | 1                            | 0                               |
| <i>BCAM</i>     | basal cell adhesion molecule (Lutheran blood group)                  | Extracellular Matrix | 19  | 30        | <i>APOE</i>           | 2                            | 0                               |
| <i>BCAR1</i>    | breast cancer anti-estrogen resistance 1                             | Unknown/other        | 16  | 25        | <i>CTRB2/CTRB1</i>    | 4                            | 8                               |
| <i>BLOC1S1</i>  | biogenesis of lysosomal organelles complex-1, subunit 1              | Metabolism           | 12  | 19        | <i>RDH5/CD63</i>      | 1                            | 0                               |
| <i>C2</i>       | complement component 2                                               | Complement           | 6   | 8         | <i>C2/CFB/SKIV2L</i>  | 2                            | 0                               |
| <i>C3</i>       | complement component 3                                               | Complement           | 19  | 28        | <i>C3</i>             | 1                            | 1                               |
| <i>C6orf10</i>  | chromosome 6 open reading frame 10                                   | Unknown/other        | 6   | 8         | <i>C2/CFB/SKIV2L</i>  | 0                            | 1                               |
| <i>C6orf48</i>  | chromosome 6 open reading frame 48                                   | Unknown/other        | 6   | 8         | <i>C2/CFB/SKIV2L</i>  | 1                            | 1                               |
| <i>C7orf61</i>  | chromosome 7 open reading frame 61                                   | Unknown/other        | 7   | 11        | <i>PILRB/PILRA</i>    | 0                            | 1                               |
| <i>C9</i>       | complement component 9                                               | Complement           | 5   | 6         | <i>C9</i>             | 2                            | 1                               |
| <i>CAPS</i>     | calcyphosine                                                         | Metabolism           | 19  | 28        | <i>C3</i>             | 0                            | 1                               |
| <i>CASP6</i>    | caspace 6, apoptosis-related cysteine peptidase                      | Cell Survival        | 4   | 5         | <i>CFI</i>            | 3                            | 1                               |
| <i>CATSPERD</i> | catsper channel auxiliary subunit delta                              | Unknown/other        | 19  | 28        | <i>C3</i>             | 1                            | 1                               |
| <i>CCDC109B</i> | coiled-coil domain containing 109B                                   | Unknown/other        | 4   | 5         | <i>CFI</i>            | 1                            | 5                               |
| <i>CD3EAP</i>   | CD3e molecule, epsilon associated protein                            | Unknown/other        | 19  | 30        | <i>APOE</i>           | 2                            | 3                               |
| <i>CETP</i>     | cholesteryl ester transfer protein, plasma                           | Lipids               | 16  | 24        | <i>CETP</i>           | 2                            | 0                               |
| <i>CFB</i>      | complement factor B                                                  | Complement           | 6   | 8         | <i>C2/CFB/SKIV2L</i>  | 1                            | 3                               |
| <i>CFH</i>      | complement factor H                                                  | Complement           | 1   | 1         | <i>CFH</i>            | 5                            | 0                               |
| <i>CFHR3</i>    | complement factor H-related 3                                        | Complement           | 1   | 1         | <i>CFH</i>            | 3                            | 1                               |
| <i>CFHR4</i>    | complement factor H-related 4                                        | Complement           | 1   | 1         | <i>CFH</i>            | 1                            | 0                               |
| <i>CFHR5</i>    | complement factor H-related 5                                        | Complement           | 1   | 1         | <i>CFH</i>            | 1                            | 0                               |
| <i>CFI</i>      | complement factor I                                                  | Complement           | 4   | 5         | <i>CFI</i>            | 12                           | 2                               |
| <i>CKM</i>      | creatine kinase, muscle                                              | Unknown/other        | 19  | 30        | <i>APOE</i>           | 4                            | 0                               |
| <i>CLPTM1</i>   | cleft lip and palate associated transmembrane protein 1              | Unknown/other        | 19  | 30        | <i>APOE</i>           | 0                            | 1                               |
| <i>CNN2</i>     | calponin 2                                                           | Immune System        | 19  | 29        | <i>CNN2</i>           | 1                            | 0                               |
| <i>COL15A1</i>  | collagen, type XV, alpha 1                                           | Extracellular Matrix | 9   | 15        | <i>TGFBR1</i>         | 5                            | 4                               |
| <i>COL4A3</i>   | collagen, type IV, alpha 3 (Goodpasture antigen)                     | Extracellular Matrix | 2   | 2         | <i>COL4A3</i>         | 4                            | 5                               |
| <i>COL8A1</i>   | collagen, type VIII, alpha 1                                         | Extracellular Matrix | 3   | 4         | <i>COL8A1</i>         | 1                            | 1                               |
| <i>CTRB1</i>    | chymotrypsinogen B1                                                  | Extracellular Matrix | 16  | 25        | <i>CTRB2/CTRB1</i>    | 1                            | 0                               |
| <i>CTSA</i>     | cathepsin A                                                          | Unknown/other        | 20  | 31        | <i>MMP9</i>           | 1                            | 2                               |
| <i>DAB2</i>     | Dab, mitogen-responsive phosphoprotein, homolog 2 (Drosophila)       | Unknown/other        | 5   | 6         | <i>C9</i>             | 2                            | 2                               |
| <i>DOM3Z</i>    | decapping exoribonuclease                                            | Unknown/other        | 6   | 8         | <i>C2/CFB/SKIV2L</i>  | 0                            | 1                               |
| <i>EGFL8</i>    | EGF-like-domain, multiple 8                                          | Unknown/other        | 6   | 8         | <i>C2/CFB/SKIV2L</i>  | 1                            | 3                               |
| <i>EHMT2</i>    | euchromatic histone-lysine N-methyltransferase 2                     | Cell Survival        | 6   | 8         | <i>C2/CFB/SKIV2L</i>  | 1                            | 0                               |

|                  |                                                                                                |                      |    |    |                       |    |    |
|------------------|------------------------------------------------------------------------------------------------|----------------------|----|----|-----------------------|----|----|
| <i>ERCC2</i>     | excision repair cross-complementing rodent repair deficiency, complementation group 2          | Cell Survival        | 19 | 30 | <i>APOE</i>           | 5  | 5  |
| <i>F13B</i>      | coagulation factor XIII, B polypeptide                                                         | Complement           | 1  | 1  | <i>CFH</i>            | 2  | 4  |
| <i>FKBP1</i>     | FK506 binding protein like                                                                     | Unknown/other        | 6  | 8  | <i>C2/CFB/SKIV2L</i>  | 0  | 1  |
| <i>FSCN2</i>     | fascin homolog 2, actin-bundling protein, retinal (Strongylocentrotus purpuratus)              | Extracellular Matrix | 17 | 27 | <i>NPLOC4/TSPAN10</i> | 4  | 4  |
| <i>FUT6</i>      | fucosyltransferase 6 (alpha (1,3) fucosyltransferase)                                          | Unknown/other        | 19 | 28 | <i>C3</i>             | 3  | 1  |
| <i>GAR1</i>      | GAR1 ribonucleoprotein                                                                         | Cell Survival        | 4  | 5  | <i>CFI</i>            | 2  | 3  |
| <i>GDF11</i>     | growth differentiation factor 11                                                               | Unknown/other        | 12 | 19 | <i>RDH5/CD63</i>      | 1  | 1  |
| <i>GPR108</i>    | G protein-coupled receptor 108                                                                 | Unknown/other        | 19 | 28 | <i>C3</i>             | 2  | 1  |
| <i>GPSM3</i>     | G-protein signaling modulator 3                                                                | Immune System        | 6  | 8  | <i>C2/CFB/SKIV2L</i>  | 1  | 0  |
| <i>GRIN3B</i>    | glutamate receptor, ionotropic, N-methyl-D-aspartate 3B                                        | Unknown/other        | 19 | 29 | <i>CNN2</i>           | 0  | 1  |
| <i>HERPUD1</i>   | homocysteine-inducible, endoplasmic reticulum stress-inducible, ubiquitin-like domain member 1 | Cell Survival        | 16 | 24 | <i>CETP</i>           | 2  | 1  |
| <i>HGS</i>       | hepatocyte growth factor-regulated tyrosine kinase substrate                                   | Unknown/other        | 17 | 27 | <i>NPLOC4/TSPAN10</i> | 6  | 6  |
| <i>HSPA1L</i>    | heat shock 70kDa protein 1-like                                                                | Cell Survival        | 6  | 8  | <i>C2/CFB/SKIV2L</i>  | 1  | 0  |
| <i>HSPH1</i>     | heat shock 105kDa/110kDa protein 1                                                             | Cell Survival        | 13 | 21 | <i>B3GALT1</i>        | 2  | 2  |
| <i>HTRA1</i>     | HtrA serine peptidase 1                                                                        | Extracellular Matrix | 10 | 18 | <i>ARMS2/HTRA1</i>    | 2  | 1  |
| <i>ITGA7</i>     | integrin, alpha 7                                                                              | Extracellular Matrix | 12 | 19 | <i>RDH5/CD63</i>      | 12 | 13 |
| <i>KCNT2</i>     | potassium channel, subfamily T, member 2                                                       | Unknown/other        | 1  | 1  | <i>CFH</i>            | 0  | 2  |
| <i>KIAA1217</i>  | KIAA1217                                                                                       | Unknown/other        | 10 | 17 | <i>ARHGAP21</i>       | 7  | 3  |
| <i>KLC3</i>      | kinesin light chain 3                                                                          | Unknown/other        | 19 | 30 | <i>APOE</i>           | 2  | 3  |
| <i>KMT2E</i>     | lysine (K)-specific methyltransferase 2E                                                       | Cell Survival        | 7  | 10 | <i>KMT2E/SRPK2</i>    | 1  | 2  |
| <i>LDHD</i>      | lactate dehydrogenase D                                                                        | Metabolism           | 16 | 25 | <i>CTRB2/CTRB1</i>    | 2  | 1  |
| <i>LIPC</i>      | lipase, hepatic                                                                                | Lipids               | 15 | 23 | <i>LIPC</i>           | 0  | 2  |
| <i>LOC654841</i> |                                                                                                | non-coding RNA       | 2  | 2  | <i>COL4A3</i>         | 1  | 0  |
| <i>LONP1</i>     | lon peptidase 1, mitochondrial                                                                 | Metabolism           | 19 | 28 | <i>C3</i>             | 3  | 2  |
| <i>LOXL2</i>     | lysyl oxidase-like 2                                                                           | Extracellular Matrix | 8  | 12 | <i>TNFRSF10A</i>      | 7  | 4  |
| <i>LRIT3</i>     | leucine-rich repeat, immunoglobulin-like and transmembrane domains 3                           | Unknown/other        | 4  | 5  | <i>CFI</i>            | 0  | 1  |
| <i>METTL7B</i>   | methyltransferase like 7B                                                                      | Unknown/other        | 12 | 19 | <i>RDH5/CD63</i>      | 4  | 1  |
| <i>MICAL1</i>    | MICAL-like 1                                                                                   | Unknown/other        | 22 | 34 | <i>SLC16A8</i>        | 0  | 1  |
| <i>MMP19</i>     | matrix metalloproteinase 19                                                                    | Extracellular Matrix | 12 | 19 | <i>RDH5/CD63</i>      | 0  | 1  |
| <i>MMP9</i>      | matrix metalloproteinase 9 (gelatinase B, 92kDa gelatinase, 92kDa type IV collagenase)         | Extracellular Matrix | 20 | 31 | <i>MMP9</i>           | 7  | 10 |
| <i>MRPL12</i>    | mitochondrial ribosomal protein L12                                                            | Metabolism           | 17 | 27 | <i>NPLOC4/TSPAN10</i> | 2  | 1  |
| <i>NCOA5</i>     | nuclear receptor coactivator 5                                                                 | Unknown/other        | 20 | 31 | <i>MMP9</i>           | 2  | 0  |
| <i>NDUFA11</i>   | NADH dehydrogenase (ubiquinone) 1 alpha subcomplex, 11, 14.7kDa                                | Metabolism           | 19 | 28 | <i>C3</i>             | 1  | 1  |
| <i>NEU1</i>      | sialidase 1 (lysosomal sialidase)                                                              | Unknown/other        | 6  | 8  | <i>C2/CFB/SKIV2L</i>  | 3  | 2  |
| <i>NEURL2</i>    | neutralized E3 ubiquitin protein ligase 2                                                      | Unknown/other        | 20 | 31 | <i>MMP9</i>           | 1  | 1  |
| <i>NOTCH4</i>    | notch 4                                                                                        | Unknown/other        | 6  | 8  | <i>C2/CFB/SKIV2L</i>  | 3  | 3  |
| <i>NPLOC4</i>    | nuclear protein localization 4 homolog (S. cerevisiae)                                         | Cell Survival        | 17 | 27 | <i>NPLOC4/TSPAN10</i> | 1  | 2  |
| <i>NRTN</i>      | neurturin                                                                                      | Immune System        | 19 | 28 | <i>C3</i>             | 0  | 1  |
| <i>NYAP1</i>     | neuronal tyrosine-phosphorylated phosphoinositide-3-kinase adaptor 1                           | Unknown/other        | 7  | 11 | <i>PILRB/PILRA</i>    | 4  | 1  |
| <i>ORMDL2</i>    | ORM1-like 2 (S. cerevisiae)                                                                    | Lipids               | 12 | 19 | <i>RDH5/CD63</i>      | 4  | 1  |
| <i>PBX2</i>      | pre-B-cell leukemia homeobox 2                                                                 | Unknown/other        | 6  | 8  | <i>C2/CFB/SKIV2L</i>  | 2  | 0  |
| <i>PCIF1</i>     | PDX1 C-terminal inhibiting factor 1                                                            | Unknown/other        | 20 | 31 | <i>MMP9</i>           | 1  | 2  |
| <i>PDE6G</i>     | phosphodiesterase 6G                                                                           | Lipids               | 17 | 27 | <i>NPLOC4/TSPAN10</i> | 0  | 1  |
| <i>PICK1</i>     | protein interacting with PRKCA 1                                                               | Unknown/other        | 22 | 34 | <i>SLC16A8</i>        | 1  | 0  |
| <i>PILRA</i>     | paired immunoglobulin-like type 2 receptor alpha                                               | Immune System        | 7  | 11 | <i>PILRB/PILRA</i>    | 5  | 3  |
| <i>PILRB</i>     | paired immunoglobulin-like type 2 receptor beta                                                | Immune System        | 7  | 11 | <i>PILRB/PILRA</i>    | 1  | 0  |
| <i>PLA2G12A</i>  | phospholipase A2, group XIA                                                                    | Lipids               | 4  | 5  | <i>CFI</i>            | 8  | 3  |
| <i>PLA2G6</i>    | phospholipase A2, group VI (cytosolic, calcium-independent)                                    | Lipids               | 22 | 34 | <i>SLC16A8</i>        | 4  | 4  |
| <i>PLEKHA1</i>   | pleckstrin homology domain containing, family A (phosphoinositide binding specific) member 1   | Lipids               | 10 | 18 | <i>ARMS2/HTRA1</i>    | 4  | 3  |
| <i>PLTP</i>      | phospholipid transfer protein                                                                  | Lipids               | 20 | 31 | <i>MMP9</i>           | 3  | 2  |

|                               |                                                                                        |                      |    |    |                       |     |     |
|-------------------------------|----------------------------------------------------------------------------------------|----------------------|----|----|-----------------------|-----|-----|
| <i>POLR2E</i>                 | polymerase (RNA) II (DNA directed) polypeptide E, 25kDa                                | Cell Survival        | 19 | 29 | <i>CNN2</i>           | 2   | 0   |
| <i>PPP1R13L</i>               | protein phosphatase 1, regulatory subunit 13 like                                      | Cell Survival        | 19 | 30 | <i>APOE</i>           | 2   | 2   |
| <i>PPP1R37</i>                | protein phosphatase 1, regulatory subunit 37                                           | Unknown/other        | 19 | 30 | <i>APOE</i>           | 0   | 2   |
| <i>PPT2</i>                   | palmitoyl-protein thioesterase 2                                                       | Lipids               | 6  | 8  | <i>C2/CFB/SKIV2L</i>  | 1   | 1   |
| <i>PRTFDC1</i>                | phosphoribosyl transferase domain containing 1                                         | Unknown/other        | 10 | 17 | <i>ARHGAP21</i>       | 0   | 1   |
| <i>PVRL2</i>                  | poliovirus receptor-related 2 (herpesvirus entry mediator B)                           | Unknown/other        | 19 | 30 | <i>APOE</i>           | 1   | 1   |
| <i>R3HCC1</i>                 | R3H domain and coiled-coil containing 1                                                | Unknown/other        | 8  | 12 | <i>TNFRSF10A</i>      | 3   | 3   |
| <i>RAD51B</i>                 | RAD51 paralog B                                                                        | Cell Survival        | 14 | 22 | <i>RAD51B</i>         | 1   | 1   |
| <i>RANBP3</i>                 | RAN binding protein 3                                                                  | Unknown/other        | 19 | 28 | <i>C3</i>             | 1   | 3   |
| <i>RDH5</i>                   | retinol dehydrogenase 5 (11-cis/9-cis)                                                 | Unknown/other        | 12 | 19 | <i>RDH5/CD63</i>      | 0   | 1   |
| <i>RELB</i>                   | v-rel avian reticuloendotheliosis viral oncogene homolog B                             | Immune System        | 19 | 30 | <i>APOE</i>           | 1   | 0   |
| <i>RRH</i>                    | retinal pigment epithelium-derived rhodopsin homolog                                   | Unknown/other        | 4  | 5  | <i>CFI</i>            | 2   | 0   |
| <i>SARM1</i>                  | sterile alpha and TIR motif containing 1                                               | Immune System        | 17 | 26 | <i>TMEM97/VTN</i>     | 1   | 0   |
| <i>SBNO2</i>                  | strawberry notch homolog 2 (Drosophila)                                                | Immune System        | 19 | 29 | <i>CNN2</i>           | 2   | 1   |
| <i>SH2D3A</i>                 | SH2 domain containing 3A                                                               | Unknown/other        | 19 | 28 | <i>C3</i>             | 0   | 1   |
| <i>SKIV2L</i>                 | superkiller viralicidic activity 2-like (S. cerevisiae)                                | Unknown/other        | 6  | 8  | <i>C2/CFB/SKIV2L</i>  | 4   | 2   |
| <i>SLC12A3</i>                | solute carrier family 12 (sodium/chloride transporter), member 3                       | Unknown/other        | 16 | 24 | <i>CETP</i>           | 8   | 6   |
| <i>SLC12A5</i>                | solute carrier family 12 (potassium/chloride transporter), member 5                    | Unknown/other        | 20 | 31 | <i>MMP9</i>           | 1   | 1   |
| <i>SLC13A2</i>                | solute carrier family 13 (sodium-dependent dicarboxylate transporter), member 2        | Unknown/other        | 20 | 26 | <i>TMEM97/VTN</i>     | 1   | 2   |
| <i>SLC16A8</i>                | solute carrier family 16 (monocarboxylate transporter), member 8                       | Metabolism           | 22 | 34 | <i>SLC16A8</i>        | 4   | 2   |
| <i>SLC25A10</i>               | solute carrier family 25 (mitochondrial carrier; dicarboxylate transporter), member 10 | Metabolism           | 17 | 27 | <i>NPLOC4/TSPAN10</i> | 0   | 1   |
| <i>SLC44A4</i>                | solute carrier family 44, member 4                                                     | Unknown/other        | 6  | 8  | <i>C2/CFB/SKIV2L</i>  | 1   | 0   |
| <i>SOX10</i>                  | SRY (sex determining region Y)-box 10                                                  | Unknown/other        | 22 | 34 | <i>SLC16A8</i>        | 0   | 1   |
| <i>SPATA25</i>                | spermatogenesis associated 25                                                          | Unknown/other        | 20 | 31 | <i>MMP9</i>           | 1   | 3   |
| <i>SRPK2</i>                  | SRSF protein kinase 2                                                                  | Unknown/other        | 7  | 10 | <i>KMT2E/SRPK2</i>    | 3   | 0   |
| <i>STAG3L5P-PVRIG2P-PILRB</i> | STAG3L5P-PVRIG2P-PILRB readthrough                                                     | non-coding RNA       | 7  | 11 | <i>PILRB/PILRA</i>    | 2   | 0   |
| <i>STK19</i>                  | serine/threonine kinase 19                                                             | Unknown/other        | 6  | 8  | <i>C2/CFB/SKIV2L</i>  | 1   | 0   |
| <i>TMEM199</i>                | transmembrane protein 199                                                              | Unknown/other        | 17 | 26 | <i>TMEM97/VTN</i>     | 0   | 1   |
| <i>TNFAIP1</i>                | tumor necrosis factor, alpha-induced protein 1 (endothelial)                           | Unknown/other        | 17 | 26 | <i>TMEM97/VTN</i>     | 4   | 1   |
| <i>TNFRSF10A</i>              | tumor necrosis factor receptor superfamily, member 10a                                 | Cell Survival        | 8  | 12 | <i>TNFRSF10A</i>      | 3   | 1   |
| <i>TNXB</i>                   | tenascin XB                                                                            | Extracellular Matrix | 6  | 8  | <i>C2/CFB/SKIV2L</i>  | 7   | 11  |
| <i>TRIP10</i>                 | thyroid hormone receptor interactor 10                                                 | Unknown/other        | 19 | 28 | <i>C3</i>             | 0   | 1   |
| <i>TSC22D4</i>                | TSC22 domain family, member 4                                                          | Unknown/other        | 7  | 11 | <i>PILRB/PILRA</i>    | 4   | 2   |
| <i>VARS</i>                   | valyl-tRNA synthetase 2, mitochondrial                                                 | Unknown/other        | 6  | 8  | <i>C2/CFB/SKIV2L</i>  | 5   | 1   |
| <i>VEGFA</i>                  | vascular endothelial growth factor A                                                   | Cell Survival        | 6  | 9  | <i>VEGFA</i>          | 1   | 0   |
| <i>VTN</i>                    | vitronectin                                                                            | Complement           | 17 | 26 | <i>TMEM97/VTN</i>     | 7   | 2   |
| <i>VWA7</i>                   | von Willebrand factor A domain containing 7                                            | Unknown/other        | 6  | 8  | <i>C2/CFB/SKIV2L</i>  | 2   | 0   |
| <i>WDR18</i>                  | WD repeat domain 18                                                                    | Unknown/other        | 19 | 29 | <i>CNN2</i>           | 3   | 4   |
| <i>ZCWPW1</i>                 | zinc finger, CW type with PWWP domain 1                                                | Unknown/other        | 7  | 11 | <i>PILRB/PILRA</i>    | 5   | 4   |
| <i>ZFP1</i>                   | ZFP1 zinc finger protein                                                               | Unknown/other        | 16 | 25 | <i>CTRB2/CTRB1</i>    | 0   | 1   |
| <i>ZNF335</i>                 | zinc finger protein 335                                                                | Unknown/other        | 20 | 31 | <i>MMP9</i>           | 5   | 9   |
| Total                         |                                                                                        |                      |    |    |                       | 337 | 273 |
