# Supplementary material
Source: PubMed Central journal article supplement (PMC5820204)
Supplement: NIHMS916231-supplement-4.pdf [file NIHMS916231-supplement-4.pdf]

**Supplementary table 5. Complete results of the Pathway-Phenotype Study**

A. Results of binary logistic regression analysis for all 7 pathways and the phenotypes: GA, CNV, pseudoregular drusen, and calcified drusen. B. Results of linear regression for all 7 pathways and the phenotypes: drusen area in ETDRS grid and the AREDS Extended Severity Scale.

GA = geographic atrophy, CNV = choroidal neovascularization, OR = odds ratio, CI = confidence interval, ECM = extracellular matrix.

**A.**

| Pathway    | Phenotype               | Rare variant carriers | Non-carriers        | p                    | OR [95% CI]       |
|------------|-------------------------|-----------------------|---------------------|----------------------|-------------------|
| Complement | GA                      | 20/36<br>(55.6%)      | 507/1391<br>(36.4%) | 0.023                | 2.17 [1.12, 4.24] |
|            | CNV                     | 22/36<br>(61.1%)      | 712/1391<br>(51.2%) | 0.242                | 1.50 [0.76, 2.96] |
|            | Pseudo-reticular Drusen | 5/36<br>(13.9%)       | 274/1391<br>(19.7%) | 0.393                | 0.66 [0.25, 1.71] |
|            | Calcified Drusen        | 26/36<br>(72.2%)      | 578/1391<br>(41.6%) | 4.6*10 <sup>-4</sup> | 3.75 [1.79, 7.86] |
| ECM        | GA                      | 25/52<br>(48.1%)      | 507/1391<br>(36.4%) | 0.120                | 1.56 [0.89, 2.71] |
|            | CNV                     | 34/52<br>(65.4%)      | 712/1391<br>(51.2%) | 0.062                | 1.74 [0.97, 3.12] |
|            | Pseudo-reticular Drusen | 14/52<br>(26.9%)      | 274/1391<br>(19.7%) | 0.230                | 1.47 [0.78, 2.75] |
|            | Calcified Drusen        | 23/52<br>(44.2%)      | 578/1391<br>(41.6%) | 0.721                | 1.11 [0.63, 1.94] |
| Lipids     | GA                      | 13/49<br>(26.5%)      | 507/1391<br>(36.4%) | 0.135                | 0.61 [0.32, 1.17] |
|            | CNV                     | 30/49<br>(61.2%)      | 712/1391<br>(51.2%) | 0.199                | 1.47 [0.82, 2.64] |
|            | Pseudo-reticular Drusen | 10/49<br>(20.4%)      | 274/1391<br>(19.7%) | 0.934                | 1.03 [0.51, 2.09] |
|            | Calcified Drusen        | 21/49<br>(42.6%)      | 578/1391<br>(41.6%) | 0.854                | 1.06 [0.59, 1.88] |

|                   |                                |                   |                     |       |                   |
|-------------------|--------------------------------|-------------------|---------------------|-------|-------------------|
| Cell Survival     | GA                             | 12/28<br>(42.9%)  | 507/1391<br>(36.4%) | 0.476 | 1.32 [0.62, 2.81] |
|                   | CNV                            | 15/28<br>(53.6%)  | 712/1391<br>(51.2%) | 0.792 | 1.11 [0.52, 2.35] |
|                   | Pseudo-<br>reticular<br>Drusen | 8/28<br>(28.6%)   | 274/1391<br>(19.7%) | 0.245 | 1.64 [0.71, 3.76] |
|                   | Calcified<br>Drusen            | 13/28<br>(46.4%)  | 578/1391<br>(41.6%) | 0.608 | 1.22 [0.57, 2.58] |
| Immune<br>System  | GA                             | 3/14<br>(21.4%)   | 507/1391<br>(36.4%) | 0.225 | 0.45 [0.13, 1.63] |
|                   | CNV                            | 7/14<br>(50.0%)   | 712/1391<br>(51.2%) | 0.872 | 0.92 [0.32, 2.63] |
|                   | Pseudo-<br>reticular<br>Drusen | 2/14<br>(14.3%)   | 274/1391<br>(19.7%) | 0.594 | 0.66 [0.15, 2.99] |
|                   | Calcified<br>Drusen            | 4/14<br>(28.6%)   | 578/1391<br>(41.6%) | 0.317 | 0.55 [0.17, 1.77] |
| Metabolism        | GA                             | 6/13<br>(46.2%)   | 507/1391<br>(36.4%) | 0.523 | 1.43 [0.48, 4.29] |
|                   | CNV                            | 6/13<br>(46.2%)   | 712/1391<br>(51.2%) | 0.652 | 0.78 [0.26, 2.33] |
|                   | Pseudo-<br>reticular<br>Drusen | 1/13<br>(7.7%)    | 274/1391<br>(19.7%) | 0.286 | 0.33 [0.04, 2.54] |
|                   | Calcified<br>Drusen            | 5/13<br>(38.5%)   | 578/1391<br>(41.6%) | 0.737 | 0.83 [0.27, 2.54] |
| Unknown/<br>other | GA                             | 60/126<br>(47.6%) | 507/1391<br>(36.4%) | 0.014 | 1.58 [1.10, 2.28] |
|                   | CNV                            | 76/126<br>(60.3%) | 712/1391<br>(51.2%) | 0.052 | 1.45 [1.00, 2.10] |
|                   | Pseudo-<br>reticular<br>Drusen | 27/126<br>(21.4%) | 274/1391<br>(19.7%) | 0.648 | 1.11 [0.71, 1.73] |
|                   | Calcified<br>Drusen            | 64/126<br>(50.8%) | 578/1391<br>(41.6%) | 0.046 | 1.45 [1.01, 2.09] |

**B.**

| Pathway           | Phenotype                     | p     | B [95% CI]           |
|-------------------|-------------------------------|-------|----------------------|
| Complement        | AREDS extended severity scale | 0.283 | 0.38 [-0.31, 1.07]   |
|                   | Drusen area within grid       | 0.708 | 0.06 [-0.26, 0.39]   |
| ECM               | AREDS extended severity scale | 0.035 | 0.62 [0.04, 1.20]    |
|                   | Drusen area within grid       | 0.219 | 0.17 [-0.10, 0.44]   |
| Lipids            | AREDS extended severity scale | 0.506 | 0.20 [-0.40, 0.80]   |
|                   | Drusen area within grid       | 0.223 | -0.18 [-0.46, 0.11]  |
| Cell Survival     | AREDS extended severity scale | 0.550 | 0.24 [-0.55, 1.02]   |
|                   | Drusen area within grid       | 0.842 | -0.04 [-0.41, 0.33]  |
| Immune System     | AREDS extended severity scale | 0.423 | -0.452 [-1.56, 0.66] |
|                   | Drusen area within grid       | 0.930 | -0.023 [-0.55, 0.50] |
| Metabolism        | AREDS extended severity scale | 0.877 | 0.09 [-1.06, 1.24]   |
|                   | Drusen area within grid       | 0.680 | -0.11 [-0.66, 0.43]  |
| Unknown/<br>other | AREDS extended severity scale | 0.004 | 0.55 [0.17, 0.93]    |
|                   | Drusen area within grid       | 0.489 | 0.06 [-0.12, 0.24]   |
