# Supplementary material
Source: PubMed Central journal article supplement (PMC5820204)
Supplement: NIHMS916231-supplement-5.pdf [file NIHMS916231-supplement-5.pdf]

|    |          |   |   |                  |                 |      |     |           |           |         |     |         |       |       |                |          |          |             |
|----|----------|---|---|------------------|-----------------|------|-----|-----------|-----------|---------|-----|---------|-------|-------|----------------|----------|----------|-------------|
| 22 | 38478793 | C | T | missense_variant | <i>SLC16A8</i>  | 36   | het | 218/1896  | 88/1515   | 30/504  | G/S | Ggc/Agc | 42771 | 23539 | NM_013356.2    | 4.31E-04 | 9.36E-04 | rs113748161 |
| 22 | 38478793 | C | T | missense_variant | <i>SLC16A8</i>  | 36   | het | 218/1896  | 88/1515   | 30/504  | G/S | Ggc/Agc | 42771 | 23539 | NM_013356.2    | 4.31E-04 | 9.36E-04 | rs113748161 |
| 22 | 38478793 | C | T | missense_variant | <i>SLC16A8</i>  | 36   | het | 218/1896  | 88/1515   | 30/504  | G/S | Ggc/Agc | 42771 | 23539 | NM_013356.2    | 4.31E-04 | 9.36E-04 | rs113748161 |
| 22 | 38482409 | C | T | missense_variant | <i>BAlAP2L2</i> | 20.9 | het | 1451/2145 | 1307/1590 | 436/529 | R/Q | cGg/cAg | 43083 | 80115 | NM_025045.4    | 3.97E-04 | 3.12E-04 | rs201761880 |
| 22 | 38528920 | C | T | missense_variant | <i>PLA2G6</i>   | 20.8 | het | 1131/3061 | 995/2259  | 332/752 | C/Y | tGt/At  | 42932 | 8398  | NM_001004426.1 | NA       | 1.04E-04 | -           |
| 22 | 38529014 | G | A | missense_variant | <i>PLA2G6</i>   | 28.6 | het | 1037/3061 | 901/2259  | 301/752 | R/C | Cgc/Tgc | 42932 | 8398  | NM_001004426.1 | 5.97E-05 | 1.04E-04 | rs367854265 |
| 22 | 38541545 | G | C | missense_variant | <i>PLA2G6</i>   | 21.4 | het | 461/3061  | 325/2259  | 109/752 | H/D | Cac/Gac | 42810 | 8398  | NM_001004426.1 | 4.28E-04 | 5.20E-04 | rs142530390 |
| 22 | 38541545 | G | C | missense_variant | <i>PLA2G6</i>   | 21.4 | het | 461/3061  | 325/2259  | 109/752 | H/D | Cac/Gac | 42810 | 8398  | NM_001004426.1 | 4.28E-04 | 5.20E-04 | rs142530390 |
