# Supplementary material
Source: PubMed Central journal article supplement (PMC5820204)
Supplement: NIHMS916231-supplement-6.pdf [file NIHMS916231-supplement-6.pdf]

**Supplementary table 4b. Rare predicted loss of function variants found in controls**

Chr = chromosome, Ref = reference allele, Alt = alternative allele, CADD = Combined Annotation Dependent Depletion score, Het/hom = heterozygous/homozygous, cDNA = complementary DNA, CDS = coding sequence, ExAC\_AF = Exome Aggregation Consortium allele frequency, Seq\_AF = Sequenced samples allele frequency, rsid = Reference SNP cluster ID

| Chr | Position  | Ref      | Alt | Annotation                             | GeneSymbol | CADD  | allele | Het/hom alt    |                | AminoAcid_positon | AminoAcid_change | CodonChange   | ExonNumber | Gene                  | Transcript | ExAC_AF  | Seq_AF      | rsid |
|-----|-----------|----------|-----|----------------------------------------|------------|-------|--------|----------------|----------------|-------------------|------------------|---------------|------------|-----------------------|------------|----------|-------------|------|
|     |           |          |     |                                        |            |       |        | cDNA_position  | CDS_position   |                   |                  |               |            |                       |            |          |             |      |
| 1   | 196295941 | C        | T   | missense_variant                       | KCNT2      | 27.3  | het    | 2242/5909      | 2182/3408      | 728/1135          | A/T              | Gct/Act       | 19/28      | 343450 NM_198503.2    | NA         | 1.04E-04 | -           |      |
| 1   | 196295991 | G        | A   | missense_variant                       | KCNT2      | 23.2  | het    | 2192/5909      | 2132/3408      | 711/1135          | A/V              | gCa/gTa       | 19/28      | 343450 NM_198503.2    | 1.65E-05   | 2.08E-04 | rs377088091 |      |
| 1   | 196748330 | CTATTTCA | C   | frameshift_variant                     | CFHR3      | NA    | het    | 185-191/1457   | 98-104/810     | 33-35/289         | LFH/X            | ctATTTTCAt/ct | 41309      | 10878 NM_001166624.1  | 3.46E-05   | 3.12E-04 | -           |      |
| 1   | 197030944 | A        | T   | missense_variant                       | F13B       | 21.7  | het    | 465/2217       | 421/1986       | 151/861           | S/T              | Tct/Act       | 42806      | 2165 NM_001994.2      | NA         | 1.04E-04 | -           |      |
| 1   | 197036552 | A        | G   | splice_donor_variant                   | F13B       | 6.958 | het    | -2472          | -1746          | -/581             | -                | -             | -          | 2165 XM_005244955.1   | NA         | 4.16E-04 | -           |      |
| 1   | 197036552 | A        | G   | splice_donor_variant                   | F13B       | 6.958 | het    | -2472          | -1746          | -/581             | -                | -             | -          | 2165 XM_005244955.1   | NA         | 4.16E-04 | -           |      |
| 1   | 197036552 | A        | G   | splice_donor_variant                   | F13B       | 6.958 | het    | -2472          | -1746          | -/581             | -                | -             | -          | 2165 XM_005244955.1   | NA         | 4.16E-04 | -           |      |
| 1   | 197062180 | A        | G   | splice_donor_variant                   | ASPM       | 19.14 | het    | -16133         | -5679          | -/1892            | -                | -             | -          | 259266 NM_001208846.1 | 1.07E-04   | 1.04E-04 | rs199503603 |      |
| 1   | 197062189 | C        | T   | missense_variant                       | ASPM       | 32    | het    | 4789/6133      | 4532/5679      | 1511/1892         | R/Q              | cGai/cAa      | 20/27      | 259266 NM_001208846.1 | 3.30E-05   | 2.08E-04 | rs146444278 |      |
| 1   | 197062189 | C        | T   | missense_variant                       | ASPM       | 32    | het    | 4789/6133      | 4532/5679      | 1511/1892         | R/Q              | cGai/cAa      | 20/27      | 259266 NM_001208846.1 | 3.30E-05   | 2.08E-04 | rs146444278 |      |
| 2   | 228173618 | C        | T   | missense_variant                       | COL4A3     | 20.3  | het    | 4628/8097      | 4466/5013      | 1489/1670         | T/I              | aCui/aTl      | 49/52      | 1285 NM_000091.4      | 2.48E-05   | 2.08E-04 | rs200818438 |      |
| 2   | 228173943 | C        | T   | missense_variant                       | COL4A3     | 25.3  | het    | 4826/8097      | 4664/5013      | 1555/1670         | A/V              | gCg/gTg       | 50/52      | 1285 NM_000091.4      | 4.13E-05   | 1.04E-04 | rs369575989 |      |
| 2   | 228176554 | C        | T   | missense_variant                       | COL4A3     | 23.2  | het    | 5143/8097      | 4981/5013      | 1661/1670         | R/C              | Ccg/Tgc       | 52/52      | 1285 NM_000091.4      | 3.06E-04   | 6.24E-04 | rs201697532 |      |
| 2   | 228176554 | C        | T   | missense_variant                       | COL4A3     | 23.2  | het    | 5143/8097      | 4981/5013      | 1661/1670         | R/C              | Ccg/Tgc       | 52/52      | 1285 NM_000091.4      | 3.06E-04   | 6.24E-04 | rs201697532 |      |
| 2   | 228176554 | C        | T   | missense_variant                       | COL4A3     | 23.2  | het    | 5143/8097      | 4981/5013      | 1661/1670         | R/C              | Ccg/Tgc       | 52/52      | 1285 NM_000091.4      | 3.06E-04   | 6.24E-04 | rs201697532 |      |
| 3   | 64635321  | G        | T   | missense_variant                       | ADAMTS9    | 31    | het    | 1629/7313      | 1597/5808      | 533/1935          | P/T              | Cca/Aca       | 14885      | 56999 NM_182920.1     | NA         | 3.12E-04 | -           |      |
| 3   | 64635321  | G        | T   | missense_variant                       | ADAMTS9    | 31    | het    | 1629/7313      | 1597/5808      | 533/1935          | P/T              | Cca/Aca       | 14885      | 56999 NM_182920.1     | NA         | 3.12E-04 | -           |      |
| 3   | 64635449  | C        | T   | missense_variant                       | ADAMTS9    | 30    | het    | 1501/7313      | 1469/5808      | 490/1935          | G/D              | gGv/gAl       | 14885      | 56999 NM_182920.1     | 2.31E-04   | 8.32E-04 | rs147650040 |      |
| 3   | 99509699  | T        | C   | missense_variant                       | COL8A1     | 27    | het    | 432/3091       | 173/2335       | 58/744            | V/A              | gTa/gCa       | 42830      | 1295 NM_001850.4      | 2.97E-04   | 2.08E-04 | -           |      |
| 4   | 110603891 | T        | C   | missense_variant                       | CCDC109B   | 23.2  | het    | 744/1274       | 605/1011       | 202/336           | L/P              | cTl/cCt       | 42863      | 55013 NM_017918.4     | 3.95E-04   | 2.08E-04 | rs200701059 |      |
| 4   | 110603891 | T        | C   | missense_variant                       | CCDC109B   | 23.2  | het    | 744/1274       | 605/1011       | 202/336           | L/P              | cTl/cCt       | 42863      | 55013 NM_017918.4     | 3.95E-04   | 2.08E-04 | rs200701059 |      |
| 4   | 110605765 | C        | T   | missense_variant                       | CCDC109B   | 24    | het    | 918/1274       | 779/1011       | 260/336           | S/F              | tCt/TTT       | 42894      | 55013 NM_017918.4     | 1.65E-05   | 2.08E-04 | -           |      |
| 4   | 110605768 | G        | A   | missense_variant                       | CCDC109B   | 20.10 | het    | 951/1274       | 812/1011       | 271/336           | R/Q              | cGai/cAa      | 42894      | 55013 NM_017918.4     | 2.22E-04   | 5.20E-04 | rs201083400 |      |
| 4   | 110605768 | G        | A   | missense_variant                       | CCDC109B   | 20.10 | het    | 951/1274       | 812/1011       | 271/336           | R/Q              | cGai/cAa      | 42894      | 55013 NM_017918.4     | 2.22E-04   | 5.20E-04 | rs201083400 |      |
| 4   | 110610551 | T        | G   | missense_variant                       | CAS9B      | 32    | het    | 895/1661       | 817/882        | 273/293           | R/Q              | Aag/Cag       | 42923      | 839 NM_001226.3       | 3.30E-05   | 2.08E-04 | rs200347007 |      |
| 4   | 110638764 | A        | G   | missense_variant                       | FLA2G12A   | 20.8  | het    | 668/5235       | 391/570        | 131/189           | C/R              | Tgc/Tgc       | 42798      | 81579 NM_030821.4     | 5.27E-04   | 9.36E-04 | rs41278045  |      |
| 4   | 110638868 | C        | T   | missense_variant                       | FLA2G12A   | 33    | het    | 533/5235       | 256/570        | 86/189            | R/X              | Gga/AGA       | 42770      | 81579 NM_030821.4     | 3.30E-05   | 1.04E-04 | -           |      |
| 4   | 110650804 | G        | C   | missense_variant                       | FLA2G12A   | 34    | het    | 439/5235       | 162/570        | 54/189            | D/E              | gaa/cGg       | 42770      | 81579 NM_030821.4     | 3.30E-05   | 1.04E-04 | rs376984776 |      |
| 4   | 110662159 | C        | G   | missense_variant                       | CFI        | 24    | het    | 1850/2161      | 1642/1752      | 548/583           | E/Q              | Gaa/Caa       | 13/13      | 3426 NM_000204.3      | 7.17E-04   | 7.28E-04 | rs7437875   |      |
| 4   | 110739212 | A        | G   | missense_variant                       | GAR1       | 24.7  | het    | 642/1267       | 335/654        | 112/217           | K/R              | aAa/aGa       | 42801      | 54433 NM_018983.3     | 1.15E-04   | 4.16E-04 | rs143266987 |      |
| 4   | 110739212 | A        | G   | missense_variant                       | GAR1       | 24.7  | het    | 642/1267       | 335/654        | 112/217           | K/R              | aAa/aGa       | 42801      | 54433 NM_018983.3     | 1.15E-04   | 4.16E-04 | rs143266987 |      |
| 4   | 110739212 | A        | G   | missense_variant                       | GAR1       | 24.7  | het    | 642/1267       | 335/654        | 112/217           | K/R              | aAa/aGa       | 42801      | 54433 NM_018983.3     | 1.15E-04   | 4.16E-04 | rs143266987 |      |
| 4   | 110791550 | C        | T   | stop_gained                            | LRIT3      | 38    | het    | 1663/3584      | 2465/2040      | 549/679           | Q/*              | Caa/Taa       | 41367      | 345193 NM_198506.4    | 8.24E-06   | 1.04E-04 | rs377143816 |      |
| 5   | 39308855  | C        | T   | stop_gained                            | C9         | 37    | het    | 1369/2693      | 1280/1680      | 427/559           | S/*              | tCai/tGa      | 41527      | 735 NM_001737.3       | 8.24E-06   | 2.08E-04 | rs121909594 |      |
| 5   | 39389465  | A        | T   | missense_variant                       | DAB2       | 26.4  | het    | 1160/4601      | 629/2313       | 210/770           | V/D              | gTl/gAl       | 42993      | 1601 NM_001343.3      | 1.24E-04   | 4.16E-04 | rs140161347 |      |
| 5   | 39392564  | C        | A   | missense_variant&splice_region_variant | DAB2       | 28.2  | het    | 764/4536       | 233/2250       | 78/749            | V/D              | gGg/gTa       | 42839      | 1601 NM_00124867.1    | NA         | 1.04E-04 | -           |      |
| 6   | 31742216  | C        | T   | missense_variant                       | VARS       | 21.2  | het    | 3809/4294      | 3386/3795      | 1120/1264         | R/Q              | cGg/cAg       | 28/30      | 7407 NM_006295.2      | 2.97E-04   | 5.20E-04 | rs150145769 |      |
| 6   | 31807421  | GA       | G   | frameshift_variant                     | CBorf48    | NA    | het    | 723/842        | 210/228        | 70/75             | G/X              | gg/Agg        | 41386      | 50854 NM_001040437.1  | NA         | 3.12E-04 | -           |      |
| 6   | 31829044  | A        | G   | missense_variant                       | NEU1       | 21.4  | het    | 692/2071       | 536/1248       | 179/415           | V/A              | gg/Agg        | 42800      | 4758 NM_000434.3      | 2.54E-05   | 1.04E-04 | rs150302766 |      |
| 6   | 31829152  | A        | T   | missense_variant                       | NEU1       | 21.8  | het    | 584/2071       | 428/1248       | 143/415           | V/E              | gTg/gAg       | 42800      | 4758 NM_000434.3      | 2.55E-05   | 1.04E-04 | -           |      |
| 6   | 31918081  | G        | A   | missense_variant                       | CFB        | 20.3  | het    | 1803/2627      | 1525/2295      | 509/764           | E/K              | Cag/Aag       | 43087      | 629 NM_001710.5       | 8.40E-06   | 2.08E-04 | rs144339757 |      |
| 6   | 31918081  | G        | A   | missense_variant                       | CFB        | 20.3  | het    | 1803/2627      | 1525/2295      | 509/764           | E/K              | Cag/Aag       | 43087      | 629 NM_001710.5       | 8.40E-06   | 2.08E-04 | rs144339757 |      |
| 6   | 31918106  | CTG      | C   | frameshift_variant                     | CFB        | NA    | het    | 1829-1830/2627 | 1551-1552/2295 | 517-518/764       | SE/SX            | tCt/Gag/tcag  | 41625      | 629 NM_001710.5       | NA         | 1.04E-04 | -           |      |
| 6   | 31935569  | CAG      | C   | frameshift_variant                     | SKIV2L     | NA    | het    | 3051-3052/4170 | 2662-2663/3741 | 888/1248          | R/X              | AG/g          | 22/28      | 6499 NM_069829.4      | 1.69E-05   | 1.04E-04 | -           |      |
| 6   | 31936795  | G        | C   | missense_variant                       | SKIV2L     | 26.3  | het    | 3717/4170      | 3328/3741      | 1110/1246         | A/P              | Ccc/Ccc       | 26/28      | 6499 NM_069829.4      | 7.58E-04   | 2.08E-04 | rs200525706 |      |
| 6   | 31939288  | A        | C   | missense_variant                       | MDM3Z      | 24.1  | het    | 498/1590       | 165/1191       | 55/396            | D/E              | gaT/gaG       | 42773      | 1797 NM_005510.3      | 5.77E-05   | 2.08E-04 | rs199557774 |      |
| 6   | 32021216  | C        | T   | missense_variant                       | TNXB       | 23.9  | het    | 8936/13125     | 8734/12729     | 2912/4242         | G/S              | Cgc/AGc       | 25/44      | 7148 NM_019105.6      | 6.72E-04   | 9.36E-04 | rs200708257 |      |
| 6   | 32021216  | C        | T   | missense_variant                       | TNXB       | 23.9  | het    | 8936/13125     | 8734/12729     | 2912/4242         | G/S              | Cgc/AGc       | 25/44      | 7148 NM_019105.6      | 6.72E-04   | 9.36E-04 | rs200708257 |      |
| 6   | 32021216  | C        | T   | missense_variant                       | TNXB       | 23.9  | het    | 8936/13125     | 8734/12729     | 2912/4242         | G/S              | Cgc/AGc       | 25/44      | 7148 NM_019105.6      | 6.72E-04   | 9.36E-04 | rs200708257 |      |
| 6   | 32058615  | C        | T   | missense_variant                       | TNXB       | 20.5  | het    | 6569/13125     | 6367/12729     | 2123/4242         | D/N              | Gac/Aac       | 18/44      | 7148 NM_019105.6      | 5.55E-04   | 5.20E-04 | rs201764050 |      |
| 6   | 32058615  | C        | T   | missense_variant                       | TNXB       | 20.5  | het    | 6569/13125     | 6367/12729     | 2123/4242         | D/N              | Gac/Aac       | 18/44      | 7148 NM_019105.6      | 5.55E-04   | 5.20E-04 | rs201764050 |      |
| 6   | 32057030  | C        | T   | missense_variant                       | TNXB       | 21.1  | het    | 2687/13125     | 2485/12729     | 829/4242          | G/S              | Cgc/AGc       | 16193      | 7148 NM_019105.6      | 1.34E-03   | 3.12E-04 | rs147172260 |      |
| 6   | 32057030  | C        | T   | missense_variant                       | TNXB       | 21.1  | het    | 2687/13125     | 2485/12729     | 829/4242          | G/S              | Cgc/AGc       | 16193      | 7148 NM_019105.6      | 1.34E-03   | 3.12E-04 | rs147172260 |      |
| 6   | 32057675  | C        | A   | missense_variant                       | TNXB       | 21.6  | het    | 413/13125      | 211/12729      | 71/4242           | V/L              | Ctg/Ttg       | 16103      | 7148 NM_019105.6      | 2.57E-04   | 9.36E-04 | rs201922477 |      |
| 6   | 32057675  | C        | A   | missense_variant                       | TNXB       | 21.6  | het    | 413/13125      | 211/12729      | 71/4242           | V/L              | Ctg/Ttg       | 16103      | 7148 NM_019105.6      | 2.57E-04   | 9.36E-04 | rs201922477 |      |
| 6   | 32057675  | C        | A   | missense_variant                       | TNXB       | 21.6  | het    | 413/13125      | 211/12729      | 71/4242           | V/L              | Ctg/Ttg       | 16103      | 7148 NM_019105.6      | 2.57E-04   | 9.36E-04 | rs201922477 |      |
| 6   | 32057675  | C        | A   | missense_variant                       | TNXB       | 21.6  | het    | 413/13125      | 211/12729      | 71/4242           | V/L              | Ctg/Ttg       | 16103      | 7148 NM_019105.6      | 2.57E-04   | 9.36E-04 | rs201922477 |      |
| 6   | 32098593  | G        | A   | missense_variant                       | FKBP1      | 24.3  | het    | 1235/1344      | 965/1050       | 322/349           | V/V              | gCg/cTc       | 42768      | 63943 NM_022110.3     | NA         | 2.08E-04 |             |      |

|    |           |    |   |                                        |  |           |       |     |            |           |           |     |         |        |        |                |             |          |             |             |
|----|-----------|----|---|----------------------------------------|--|-----------|-------|-----|------------|-----------|-----------|-----|---------|--------|--------|----------------|-------------|----------|-------------|-------------|
| 7  | 100071904 | C  | T | missense_variant                       |  | TSC22D4   | 21.2  | het | 1677/2383  | 922/1188  | 308/395   | D/N | Gat/Aat | 42799  | 81628  | NM_030935.3    | 6.59E-04    | 7.28E-04 | rs151058099 |             |
| 7  | 100084515 | G  | A | missense_variant                       |  | NYAP1     | 23.5  | het | 299/3584   | 140/2526  | 47/841    | R/Q | cGg/cTg | 42801  | 222950 | NM_173564.3    | 2.40E-04    | 3.12E-04 | rs202135611 |             |
| 7  | 104747909 | G  | T | missense_variant                       |  | KMT2E     | 22.5  | het | 3391/6715  | 3005/5577 | 1002/1858 | S/I | aGo/aTc | 21/26  | 55904  | NM_018682.3    | 8.24E-06    | 1.04E-04 | -           |             |
| 7  | 104748280 | G  | A | missense_variant                       |  | KMT2E     | 27.4  | het | 3762/6715  | 3376/5577 | 1126/1858 | E/K | Gaa/Aaa | 21/26  | 55904  | NM_018682.3    | 5.77E-05    | 1.04E-04 | rs146130548 |             |
| 8  | 23082276  | AG | A | frameshift_variant                     |  | TNFRSF10A | NA    | het | 404/1750   | 298/1407  | 100/468   | L/X | Ctg/Tg  | 41283  | 8797   | NM_003844.3    | 5.16E-05    | 1.04E-04 | -           |             |
| 8  | 23147516  | G  | A | missense_variant                       |  | R3HCC1    | 20.3  | het | 506/1625   | 506/1443  | 169/480   | R/H | cGt/cAt | 42864  | 203069 | XM_005273427.1 | 1.64E-04    | 6.24E-04 | -           |             |
| 8  | 23147516  | G  | A | missense_variant                       |  | R3HCC1    | 20.3  | het | 506/1625   | 506/1443  | 169/480   | R/H | cGt/cAt | 42864  | 203069 | XM_005273427.1 | 1.64E-04    | 6.24E-04 | -           |             |
| 8  | 23147516  | G  | A | missense_variant                       |  | R3HCC1    | 20.3  | het | 506/1625   | 506/1443  | 169/480   | R/H | cGt/cAt | 42864  | 203069 | XM_005273427.1 | 1.64E-04    | 6.24E-04 | -           |             |
| 8  | 23156435  | A  | G | missense_variant                       |  | LXL2      | 23.7  | het | 2498/3810  | 2159/2325 | 1027/774  | V/A | gTt/gTc | 13/14  | 4017   | NM_002318.2    | 5.19E-04    | 5.20E-04 | rs148111808 |             |
| 8  | 23167211  | C  | T | missense_variant                       |  | LXL2      | 20.10 | het | 2189/3810  | 1850/2325 | 617/774   | R/H | cGc/cAc | 43022  | 4017   | NM_002318.2    | 4.96E-05    | 1.04E-04 | rs371040157 |             |
| 8  | 23174498  | C  | T | missense_variant                       |  | LXL2      | 28.5  | het | 1939/3810  | 1600/2325 | 534/774   | G/R | Gga/Aga | 42992  | 4017   | NM_002318.2    | 0.013       | 7.28E-04 | rs149587418 |             |
| 8  | 23174498  | C  | T | missense_variant                       |  | LXL2      | 28.5  | het | 1939/3810  | 1600/2325 | 534/774   | G/R | Gga/Aga | 42992  | 4017   | NM_002318.2    | 0.013       | 7.28E-04 | rs149587418 |             |
| 9  | 101830877 | G  | A | missense_variant                       |  | COL15A1   | 20.10 | het | 4227/5422  | 3878/4167 | 1293/1388 | G/D | gGc/gAc | 41/42  | 1306   | NM_001855.4    | 3.30E-04    | 7.28E-04 | rs141581682 |             |
| 9  | 101830877 | G  | A | missense_variant                       |  | COL15A1   | 20.10 | het | 4227/5422  | 3878/4167 | 1293/1388 | G/D | gGc/gAc | 41/42  | 1306   | NM_001855.4    | 3.30E-04    | 7.28E-04 | rs141581682 |             |
| 9  | 101830877 | G  | A | missense_variant                       |  | COL15A1   | 20.10 | het | 4227/5422  | 3878/4167 | 1293/1388 | G/D | gGc/gAc | 41/42  | 1306   | NM_001855.4    | 3.30E-04    | 7.28E-04 | rs141581682 |             |
| 9  | 101832028 | C  | T | stop_gained                            |  | COL15A1   | 44    | het | 4376/5422  | 4027/4167 | 1343/1388 | R/* | Cga/Tga | 42/42  | 1306   | NM_001855.4    | NA          | 1.04E-04 | -           |             |
| 9  | 101980764 | C  | T | missense_variant                       |  | ALG2      | 34    | het | 773/2830   | 703/1251  | 235/416   | E/K | Gaa/Aaa | 42768  | 85365  | NM_033087.3    | 1.65E-05    | 1.04E-04 | rs189167741 |             |
| 9  | 101980764 | C  | T | missense_variant                       |  | ALG2      | 21.6  | het | 665/2830   | 595/1251  | 199/416   | L/F | Ctc/Ttc | 42768  | 85365  | NM_033087.3    | 8.24E-06    | 1.04E-04 | -           |             |
| 9  | 107558399 | C  | T | missense_variant                       |  | ABCA1     | 27.6  | het | 5721/10503 | 5317/6786 | 173/2261  | V/M | Gtg/Atg | 39/50  | 19     | NM_005502.3    | 1.65E-05    | 1.04E-04 | rs370103164 |             |
| 9  | 107558626 | T  | C | missense_variant                       |  | ABCA1     | 23.7  | het | 5605/10503 | 5201/6786 | 1734/2261 | N/S | aAt/aGt | 38/50  | 19     | NM_005502.3    | NA          | 2.08E-04 | -           |             |
| 9  | 107560803 | C  | T | missense_variant                       |  | ABCA1     | 29.5  | het | 5424/10503 | 5020/6786 | 1674/2261 | V/I | Gta/Ata | 37/50  | 19     | NM_005502.3    | 6.92E-04    | 2.08E-04 | rs138422574 |             |
| 9  | 107582258 | T  | C | missense_variant                       |  | ABCA1     | 31    | het | 3457/10503 | 3053/6786 | 1018/2261 | D/W | gAt/gTg | 21/50  | 19     | NM_005502.3    | 4.37E-04    | 8.32E-04 | rs140365800 |             |
| 9  | 107591316 | G  | A | missense_variant                       |  | ABCA1     | 23    | het | 2400/10503 | 1996/6786 | 666/2261  | R/G | Cgg/Tgg | 15/50  | 19     | NM_005502.3    | 4.94E-05    | 1.04E-04 | rs201599169 |             |
| 9  | 107592263 | G  | A | missense_variant&splice_region_variant |  | ABCA1     | 21.3  | het | 1713/10503 | 1309/6786 | 437/2261  | R/W | Cgg/Tgg | 18568  | 19     | NM_005502.3    | 5.77E-05    | 1.04E-04 | rs150448790 |             |
| 9  | 107646756 | G  | A | missense_variant                       |  | ABCA1     | 32    | het | 658/10503  | 254/6786  | 85/2261   | P/L | cCg/cTg | 13/14  | 18354  | 19             | NM_005502.3 | 1.26E-03 | 5.20E-04    | rs145183203 |
| 9  | 107646756 | G  | A | missense_variant                       |  | ABCA1     | 32    | het | 658/10503  | 254/6786  | 85/2261   | P/L | cCg/cTg | 13/14  | 18354  | 19             | NM_005502.3 | 1.26E-03 | 5.20E-04    | rs145183203 |
| 10 | 24810825  | G  | A | missense_variant                       |  | KIAA1217  | 32    | het | 2992/6123  | 2183/3795 | 728/1264  | R/H | cGc/cAc | 13/19  | 56243  | NM_001098500.1 | 2.31E-04    | 4.16E-04 | rs141531788 |             |
| 10 | 24810825  | G  | A | missense_variant                       |  | KIAA1217  | 32    | het | 2992/6123  | 2183/3795 | 728/1264  | R/H | cGc/cAc | 13/19  | 56243  | NM_001098500.1 | 2.31E-04    | 4.16E-04 | rs141531788 |             |
| 10 | 24816911  | A  | G | missense_variant                       |  | KIAA1217  | 20.5  | het | 3514/6123  | 2705/3795 | 902/1264  | Y/C | IAI/IgT | 15/19  | 56243  | NM_001098500.1 | 4.86E-04    | 5.20E-04 | rs138435732 |             |
| 10 | 24885785  | C  | T | missense_variant                       |  | ARHGAP21  | 30    | het | 3848/7167  | 3361/5877 | 1121/1958 | G/S | Ggc/Agc | 17/26  | 57584  | NM_020824.3    | 6.45E-03    | 3.12E-04 | rs111419738 |             |
| 10 | 24885785  | C  | T | missense_variant                       |  | ARHGAP21  | 30    | het | 3848/7167  | 3361/5877 | 1121/1958 | G/S | Ggc/Agc | 17/26  | 57584  | NM_020824.3    | 6.45E-03    | 3.12E-04 | rs111419738 |             |
| 10 | 24889799  | G  | C | missense_variant                       |  | ARHGAP21  | 22.1  | het | 3395/7167  | 2908/5877 | 970/1958  | L/V | Ctt/Gtt | 14/26  | 57584  | NM_020824.3    | 4.86E-04    | 3.12E-04 | rs144895449 |             |
| 10 | 25138812  | G  | T | stop_gained                            |  | PRTFDC1   | 18.12 | het | 668/1926   | 639/678   | 213/225   | C/* | gTt/gTg | 41/525 | 56952  | NM_020200.5    | 1.31E-04    | 2.08E-04 | rs35671637  |             |
| 10 | 124187795 | C  | T | missense_variant                       |  | PLEKHA1   | 34    | het | 1113/3986  | 904/1005  | 302/334   | R/W | Cgg/Tgg | 13/14  | 59338  | NM_001195608.1 | 2.39E-04    | 2.08E-04 | -           |             |
| 10 | 124187795 | C  | T | missense_variant                       |  | PLEKHA1   | 34    | het | 1113/3986  | 904/1005  | 302/334   | R/W | Cgg/Tgg | 13/14  | 59338  | NM_001195608.1 | 2.39E-04    | 2.08E-04 | -           |             |
| 10 | 124189247 | CT | C | frameshift_variant                     |  | PLEKHA1   | NA    | het | 1258/3881  | 1009/1215 | 337/404   | F/X | Tt/tTt  | 41/619 | 59338  | NM_001001974.2 | 1.89E-04    | 6.24E-04 | -           |             |
| 10 | 124248514 | G  | A | missense_variant                       |  | HTRA1     | 22.9  | het | 697/2120   | 569/1443  | 190/480   | R/H | cGc/cAc | 41/42  | 5654   | NM_002775.4    | 4.12E-05    | 1.04E-04 | -           |             |
| 12 | 56077768  | C  | T | stop_gained                            |  | METTL7B   | 18.73 | het | 879/1506   | 670/735   | 224/244   | R/* | Cga/Tga | 41/306 | 196410 | NM_152637.2    | 4.00E-03    | 3.12E-04 | rs115687886 |             |
| 12 | 56078883  | C  | T | missense_variant                       |  | ITGA7     | 20.2  | het | 3605/4136  | 3385/3426 | 1129/1141 | E/K | Gag/Aag | 25/25  | 3679   | NM_001144996.1 | 1.65E-05    | 1.04E-04 | rs371203166 |             |
| 12 | 56078988  | G  | A | stop_gained                            |  | ITGA7     | 41    | het | 3500/4136  | 3280/3426 | 1094/1141 | Q/* | Cag/Tag | 25/25  | 3679   | NM_001144996.1 | 3.05E-04    | 2.08E-04 | rs200390529 |             |
| 12 | 56078988  | G  | A | stop_gained                            |  | ITGA7     | 41    | het | 3500/4136  | 3280/3426 | 1094/1141 | Q/* | Cag/Tag | 25/25  | 3679   | NM_001144996.1 | 3.05E-04    | 2.08E-04 | rs200390529 |             |
| 12 | 56079053  | G  | A | missense_variant                       |  | ITGA7     | 43    | het | 3435/4136  | 3215/3426 | 1072/1141 | A/V | gCg/gTg | 25/25  | 3679   | NM_001144996.1 | 9.23E-04    | 8.32E-04 | rs139136931 |             |
| 12 | 56079053  | G  | A | missense_variant                       |  | ITGA7     | 43    | het | 3801/4502  | 3448/3489 | 1150/1162 | R/* | Cag/Tga | 27/27  | 3679   | XM_005268841.1 | 9.23E-04    | 8.32E-04 | rs139136931 |             |
| 12 | 56079053  | G  | A | missense_variant                       |  | ITGA7     | 43    | het | 3435/4136  | 3215/3426 | 1072/1141 | A/V | gCg/gTg | 25/25  | 3679   | NM_001144996.1 | 9.23E-04    | 8.32E-04 | rs139136931 |             |
| 12 | 56079053  | G  | A | missense_variant                       |  | ITGA7     | 43    | het | 3801/4502  | 3448/3489 | 1150/1162 | R/* | Cag/Tga | 27/27  | 3679   | XM_005268841.1 | 9.23E-04    | 8.32E-04 | rs139136931 |             |
| 12 | 56088642  | C  | T | missense_variant                       |  | ITGA7     | 25.9  | het | 2348/4136  | 2128/3426 | 710/1141  | D/N | Gat/Aat | 15/25  | 3679   | NM_001144996.1 | 8.24E-06    | 1.04E-04 | rs145287267 |             |
| 12 | 56088645  | C  | T | missense_variant                       |  | ITGA7     | 26.6  | het | 2345/4136  | 2125/3426 | 709/1141  | G/R | Ggg/Agg | 15/25  | 3679   | NM_001144996.1 | NA          | 1.04E-04 | -           |             |
| 12 | 56090189  | T  | G | missense_variant                       |  | ITGA7     | 32    | het | 1997/4136  | 1777/3426 | 593/1141  | I/L | Att/Ctt | 13/25  | 3679   | NM_001144996.1 | 2.89E-04    | 6.24E-04 | rs200065922 |             |
| 12 | 56090189  | T  | G | missense_variant                       |  | ITGA7     | 32    | het | 1997/4136  | 1777/3426 | 593/1141  | I/L | Att/Ctt | 13/25  | 3679   | NM_001144996.1 | 2.89E-04    | 6.24E-04 | rs200065922 |             |
| 12 | 56094076  | G  | A | missense_variant                       |  | ITGA7     | 20.7  | het | 992/4136   | 772/3426  | 258/1141  | L/F | Ctc/Ttc | 42/880 | 3679   | NM_001144996.1 | 4.15E-05    | 2.08E-04 | -           |             |
| 12 | 56095165  | C  | A | stop_gained&splice_region_variant      |  | ITGA7     | 13.11 | het | 157/3661   | 121/3135  | 41/1044   | E/* | Gaa/Taa | 41/357 | 3679   | NM_001144996.1 | 1.36E-05    | 2.08E-04 | -           |             |
| 12 | 56115149  | AC | A | frameshift_variant                     |  | RDH5      | NA    | het | 370/1342   | 182/957   | 61/318    | T/X | aCc/ac  | 41/309 | 5959   | NM_001199771.1 | NA          | 1.04E-04 | rs34619378  |             |
| 12 | 56142589  | G  | A | missense_variant                       |  | GDF11     | 24.5  | het | 702/4260   | 665/1224  | 222/407   | R/H | cGc/cAc | 42769  | 10220  | NM_005811.3    | NA          | 2.08E-04 | -           |             |
| 12 | 56212940  | A  | C | missense_variant                       |  | ORMDL2    | 23.7  | het | 249/1334   | 157/462   | 53/153    | N/H | Aac/Cac | 42/770 | 29095  | NM_014182.4    | 2.80E-03    | 3.12E-04 | rs182538760 |             |
| 12 | 56236602  | G  | A | stop_gained                            |  | MMP19     | 22.2  | het | 166/3018   | 13/918    | 5/305     | Q/* | Cag/Tag | 4/280  | 4327   | NM_001272101.1 | 2.67E-03    | 3.12E-04 | rs17844787  |             |
| 12 | 112147438 | C  | T | missense_variant                       |  | ACAD10    | 22    | het | 840/4107   | 640/3273  | 214/1090  | L/R | Ctt/Ttt | 42/877 | 80724  | NM_001136538.1 | 4.20E-04    | 2.08E-04 | rs199662727 |             |
| 12 | 112153654 | G  | A | missense_variant                       |  | ACAD10    | 21.6  | het | 1173/4107  | 973/3273  | 325/1090  | G/R | Ggg/Agg | 42/969 | 80724  | NM_001136538.1 | 7.41E-05    | 2.08E-04 | -           |             |
| 12 | 112167654 | C  | T | stop_gained                            |  | ACAD10    | 42    | het | 1581/4107  | 1381/3273 | 461/1090  | R/* | Cga/Tga | 41/599 | 80724  | NM_001136538.1 | 1.81E-04    | 2.08E-04 | rs146335507 |             |
| 12 | 112186211 | T  | C | missense_variant                       |  | ACAD10    | 23.8  | het | 2869/4107  | 2669/3273 | 890/1090  | V/A | gTt/gTc | 18/22  | 80724  | NM_001136538.1 | 3.46E-04    | 4.16E-04 | rs374524601 |             |
| 12 | 112186211 | T  | C | missense_variant                       |  | ACAD10    | 23.8  | het | 2869/4107  | 2669/3273 | 890/1090  | V/A | gTt/gTc | 18/22  | 80724  | NM_001136538.1 | 3.46E-04    | 4.16E-04 | rs374524601 |             |
| 12 | 112194215 | G  | A | missense_variant                       |  | ACAD10    | 24.8  | het | 3411/4107  | 3211/3273 | 1071/1090 | D/N | Gac/Aac | 22/22  | 80724  | NM_001136538.1 | 2.88E-04    | 5.20E-04 | rs142030532 |             |
| 12 | 112221023 | G  | A | missense_variant                       |  | ALDH2     | 33.2  | het | 377/2060   | 281/1554  | 94/517    | R/H | cGc/cAc | 42/807 | 217    | NM_000690.3    | 6.59E-05    | 1.04E-04 | rs201745983 |             |
| 12 | 1122      |    |   |                                        |  |           |       |     |            |           |           |     |         |        |        |                |             |          |             |             |



|    |          |   |   |                         |         |       |     |           |           |           |     |         |       |       |                |          |          |             |
|----|----------|---|---|-------------------------|---------|-------|-----|-----------|-----------|-----------|-----|---------|-------|-------|----------------|----------|----------|-------------|
| 20 | 44577821 | A | T | missense_variant        | ZNF335  | 21.1  | het | 4012/4452 | 3889/4029 | 1297/1342 | S/T | Tca/Aca | 27/28 | 63925 | NM_022095.3    | 1.65E-05 | 1.04E-04 | -           |
| 20 | 44578709 | C | T | splice_acceptor_variant | ZNF335  | 14.4  | het | -/4452    | -/4029    | -/1342    | -   | -       | -     | 63925 | NM_022095.3    | NA       | 1.04E-04 | -           |
| 20 | 44578900 | T | C | missense_variant        | ZNF335  | 20.9  | het | 3568/4452 | 3445/4029 | 1149/1342 | I/V | Atc/Gtc | 22/28 | 63925 | NM_022095.3    | NA       | 4.16E-04 | rs143113106 |
| 20 | 44587908 | T | A | missense_variant        | ZNF335  | 28    | het | 2308/4452 | 2185/4029 | 729/1342  | I/F | Att/Ttt | 15/28 | 63925 | NM_022095.3    | 8.41E-04 | 7.28E-04 | rs190178539 |
| 20 | 44587908 | T | A | missense_variant        | ZNF335  | 28    | het | 2308/4452 | 2185/4029 | 729/1342  | I/F | Att/Ttt | 15/28 | 63925 | NM_022095.3    | 8.41E-04 | 7.28E-04 | rs190178539 |
| 20 | 44587908 | T | A | missense_variant        | ZNF335  | 28    | het | 2308/4452 | 2185/4029 | 729/1342  | I/F | Att/Ttt | 15/28 | 63925 | NM_022095.3    | 8.41E-04 | 7.28E-04 | rs190178539 |
| 20 | 44592138 | G | A | missense_variant        | ZNF335  | 27    | het | 1630/4452 | 1507/4029 | 503/1342  | R/C | Cgt/Tgt | 43006 | 63925 | NM_022095.3    | 8.24E-06 | 1.04E-04 | -           |
| 20 | 44592204 | G | C | missense_variant        | ZNF335  | 20.5  | het | 1564/4452 | 1441/4029 | 481/1342  | R/G | Cgc/Ggc | 43006 | 63925 | NM_022095.3    | 9.06E-05 | 5.20E-04 | rs141481390 |
| 20 | 44592381 | G | A | missense_variant        | ZNF335  | 22.6  | het | 1474/4452 | 1351/4029 | 451/1342  | R/C | Cgc/Gtc | 42975 | 63925 | NM_022095.3    | NA       | 1.04E-04 | rs148130868 |
| 20 | 44639243 | G | A | missense_variant        | MMP9    | 36    | het | 512/2336  | 493/2124  | 165/707   | D/N | Gac/Aac | 42807 | 4318  | NM_004994.2    | 2.80E-04 | 4.16E-04 | rs8125581   |
| 20 | 44639243 | G | A | missense_variant        | MMP9    | 36    | het | 512/2336  | 493/2124  | 165/707   | D/N | Gac/Aac | 42807 | 4318  | NM_004994.2    | 2.80E-04 | 4.16E-04 | rs8125581   |
| 20 | 44639243 | G | A | missense_variant        | MMP9    | 36    | het | 512/2336  | 493/2124  | 165/707   | D/N | Gac/Aac | 42807 | 4318  | NM_004994.2    | 2.80E-04 | 4.16E-04 | rs8125581   |
| 20 | 44639905 | C | T | missense_variant        | MMP9    | 24.4  | het | 792/2336  | 773/2124  | 258/707   | T/I | aCc/aTc | 42868 | 4318  | NM_004994.2    | 9.23E-04 | 9.36E-04 | rs41529445  |
| 20 | 44639905 | C | T | missense_variant        | MMP9    | 24.4  | het | 792/2336  | 773/2124  | 258/707   | T/I | aCc/aTc | 42868 | 4318  | NM_004994.2    | 9.23E-04 | 9.36E-04 | rs41529445  |
| 20 | 44639905 | C | T | missense_variant        | MMP9    | 24.4  | het | 792/2336  | 773/2124  | 258/707   | T/I | aCc/aTc | 42868 | 4318  | NM_004994.2    | 9.23E-04 | 9.36E-04 | rs41529445  |
| 20 | 44641191 | G | A | missense_variant        | MMP9    | 27.8  | het | 1319/2336 | 1300/2124 | 434/707   | D/N | Gac/Aac | 42960 | 4318  | NM_004994.2    | 1.65E-05 | 1.04E-04 | rs199893610 |
| 20 | 44642364 | G | A | stop_gained             | MMP9    | 21    | het | 1698/2336 | 1679/2124 | 560/707   | W/* | tGg/tAg | 41559 | 4318  | NM_004994.2    | 9.88E-05 | 4.16E-04 | rs138685704 |
| 20 | 44642364 | G | A | stop_gained             | MMP9    | 21    | het | 1698/2336 | 1679/2124 | 560/707   | W/* | tGg/tAg | 41559 | 4318  | NM_004994.2    | 9.88E-05 | 4.16E-04 | rs138685704 |
| 20 | 44642364 | G | A | stop_gained             | MMP9    | 21    | het | 1698/2336 | 1679/2124 | 560/707   | W/* | tGg/tAg | 41559 | 4318  | NM_004994.2    | 9.88E-05 | 4.16E-04 | rs138685704 |
| 20 | 44664420 | C | T | missense_variant        | SLC12A5 | 23.8  | het | 429/6041  | 353/3420  | 118/1139  | P/L | cCa/cTa | 42851 | 57468 | NM_00113477.1  | 1.40E-04 | 3.12E-04 | -           |
| 22 | 38328647 | G | A | missense_variant        | MICALL1 | 35    | het | 2379/4495 | 2104/2592 | 702/863   | G/R | Ggg/Agg | 43055 | 85377 | NM_033386.3    | 2.47E-05 | 2.08E-04 | rs368940855 |
| 22 | 38379518 | C | G | missense_variant        | SOX10   | 29.9  | het | 552/2862  | 274/1401  | 92/466    | V/L | Gtg/Ctg | 42770 | 6663  | NM_006941.3    | 1.98E-04 | 2.08E-04 | rs142113652 |
| 22 | 38478793 | C | T | missense_variant        | SLC16A8 | 36    | het | 218/1896  | 88/1515   | 30/504    | G/S | Ggc/Agc | 42771 | 23539 | NM_013356.2    | 4.31E-04 | 9.36E-04 | rs113748161 |
| 22 | 38478793 | C | T | missense_variant        | SLC16A8 | 36    | het | 218/1896  | 88/1515   | 30/504    | G/S | Ggc/Agc | 42771 | 23539 | NM_013356.2    | 4.31E-04 | 9.36E-04 | rs113748161 |
| 22 | 38508219 | A | C | stop_gained             | PLA2G6  | 37    | het | 2344/3061 | 2208/2259 | 736/752   | Y/* | taTtaG  | 16/16 | 8398  | NM_001004426.1 | 4.95E-05 | 1.04E-04 | rs121908680 |
| 22 | 38528924 | C | T | missense_variant        | PLA2G6  | 34    | het | 1127/3061 | 991/2259  | 331/752   | D/N | Gac/Aac | 42932 | 8398  | NM_001004426.1 | NA       | 1.04E-04 | rs199935023 |
| 22 | 38531030 | C | T | missense_variant        | PLA2G6  | 27.3  | het | 995/3061  | 859/2259  | 287/752   | G/R | Gga/Aga | 42902 | 8398  | NM_001004426.1 | 8.24E-06 | 1.04E-04 | -           |
| 22 | 38536076 | C | T | missense_variant        | PLA2G6  | 20.39 | het | 846/3061  | 710/2259  | 237/752   | R/H | cGc/cAc | 42871 | 8398  | NM_001004426.1 | 1.24E-04 | 1.04E-04 | rs147066967 |
